# Supplementary material for: Analysis of Runoff Changes in the Wei River Basin, China: Confronting Climate Change and Human Activities
Source: MDPI journal article supplement (doi:10.3390/w15112081), 2023-05-30
Supplement: s1 [file s1]

# Analysis of Runoff Changes in the Wei River Basin, China: Confronting Climate Change and Human Activities

Ruirui Xu <sup>1, 2, 3</sup>, Chaojun Gu <sup>4</sup>, Dexun Qiu <sup>1, 2, 3</sup>, Changxue Wu <sup>2</sup>, Xingmin Mu <sup>1, 2, 3\*</sup>, Peng Gao <sup>1, 2, 3\*</sup>

**Table S1**

Information of the hydrological stations.

| River | Hydrological stations | Longitude (E) | Latitude (N) | Time series | Average Runoff (10 <sup>8</sup> m <sup>3</sup> ) |
|-------|-----------------------|---------------|--------------|-------------|--------------------------------------------------|
| BLR   | Wuqi                  | 108.20        | 36.88        | 1970-2108   | 0.81                                             |
|       | Liujiahe              | 108.77        | 36.55        | 1970-2108   | 2.11                                             |
|       | Zhangcunyi            | 109.13        | 35.90        | 1970-2108   | 1.01                                             |
|       | Jiaokouhe             | 109.35        | 35.65        | 1970-2108   | 4.27                                             |
|       | Zhuangtou             | 109.83        | 35.03        | 1970-2108   | 6.14                                             |
| JR    | Hongde                | 107.20        | 36.77        | 1970-2108   | 0.55                                             |
|       | Maojiahe              | 107.58        | 35.52        | 1970-2108   | 1.57                                             |
|       | Yangjiaping           | 107.73        | 35.33        | 1970-2108   | 5.55                                             |
|       | Yuluoping             | 107.88        | 35.33        | 1970-2108   | 4.01                                             |
|       | Zhangjiashan          | 108.60        | 34.63        | 1970-2108   | 13.44                                            |
| WR    | Qin'an                | 105.67        | 34.90        | 1970-2108   | 2.15                                             |
|       | Gangu                 | 105.33        | 34.77        | 1970-2108   | 0.57                                             |
|       | Wushan                | 104.88        | 34.73        | 1970-2108   | 5.01                                             |
|       | Linjiacun             | 107.05        | 34.38        | 1970-2108   | 15.51                                            |
|       | Xianyang              | 108.70        | 34.32        | 1970-2108   | 31.62                                            |
|       | Huaxian               | 109.77        | 34.58        | 1970-2108   | 56.51                                            |

**Table S2**

The information of hydro-meteorological characteristics of the 16 sub-regions in the Wei River Basin.

| River | Number | Sub-regions                            | Drainage                   | Long term mean value |                  |                    |           |      |
|-------|--------|----------------------------------------|----------------------------|----------------------|------------------|--------------------|-----------|------|
|       |        |                                        | Area<br>(km <sup>2</sup> ) | Annual<br>R (mm)     | Annual<br>P (mm) | Annual<br>PET (mm) | PET<br>/P | n    |
| BR    | 1      | Wuqi                                   | 3487                       | 23.28                | 453.16           | 876.80             | 1.93      | 2.79 |
|       | 2      | Wuqi-Liujiahe                          | 3950                       | 32.74                | 453.16           | 876.80             | 1.93      | 2.44 |
|       | 3      | Zhangcunyi                             | 4885                       | 20.62                | 530.17           | 966.61             | 1.82      | 3.28 |
|       | 4      | Liujiahe-Zhangcunyi-<br>Jiaokouhe      | 5086                       | 22.73                | 568.00           | 1034.74            | 1.82      | 3.25 |
|       | 5      | Jiaokouhe-Zhuangtou                    | 8066                       | 23.10                | 593.40           | 1033.37            | 1.74      | 3.46 |
| JR    | 6      | Hongde                                 | 4729                       | 11.60                | 395.58           | 1070.29            | 2.71      | 2.55 |
|       | 7      | Hongde-Yuluoping                       | 14619                      | 23.63                | 479.36           | 1014.86            | 2.12      | 2.61 |
|       | 8      | Maojiahe                               | 7283                       | 21.50                | 471.02           | 1020.18            | 2.17      | 2.63 |
|       | 9      | Maojiahe-Yangjiaping                   | 7117                       | 55.89                | 509.60           | 995.73             | 1.95      | 2.00 |
|       | 10     | Yangjiaping-Yuluoping-<br>Zhangjiashan | 10229                      | 37.97                | 582.52           | 957.75             | 1.64      | 3.00 |
| WR    | 11     | Wushan                                 | 8285                       | 60.40                | 523.92           | 854.47             | 1.63      | 2.30 |
|       | 12     | Gangu                                  | 2531                       | 22.57                | 469.24           | 843.52             | 1.80      | 3.08 |
|       | 13     | Qinan                                  | 10046                      | 21.37                | 448.02           | 912.85             | 2.04      | 2.73 |
|       | 14     | Gangu-Qinan-Linjiacun                  | 10636                      | 73.05                | 532.27           | 921.88             | 1.73      | 1.97 |
|       | 15     | Linjiacin-Xianyang                     | 16975                      | 91.98                | 630.57           | 951.51             | 1.51      | 2.17 |
|       | 16     | Xianyang-Zhangjiashan-<br>Huaxian      | 15456                      | 75.31                | 593.84           | 1020.68            | 1.72      | 2.08 |

**Table S3**

The change of hydro-meteorological characteristic and the contribution of climatic and human activities factors to runoff changes in sixteen catchments.

| River and regions number |    | Change before and after the abrupt year |       |      |      | Abrupt year | Runoff change induced by P/PET/n (mm) |                  |              | Contribution rate to runoff change (%) |           |       |
|--------------------------|----|-----------------------------------------|-------|------|------|-------------|---------------------------------------|------------------|--------------|----------------------------------------|-----------|-------|
|                          |    | R                                       | P     | PET  | n    |             | $\Delta R_P$                          | $\Delta R_{PET}$ | $\Delta R_n$ | $C_P$                                  | $C_{PET}$ | $C_n$ |
|                          |    | (mm)                                    | (mm)  | (mm) |      |             |                                       |                  |              |                                        |           |       |
| BLR                      | 1  | −13.6                                   | 4.9   | 0.2  | 0.7  | 2002 **     | 0.9                                   | 0.0              | −15.4        | −6.2                                   | 0.1       | 106.1 |
|                          | 2  | −14.3                                   | 4.9   | 0.3  | 0.5  | 2002 **     | 1.1                                   | 0.0              | −16.0        | −7.6                                   | 0.2       | 107.4 |
|                          | 3  | −2.4                                    | −4.8  | 38.5 | −0.1 | 1994 (NS)   | −0.7                                  | −2.5             | 1.0          | 34                                     | 113       | −47   |
|                          | 4  | 6.2                                     | 52.2  | 19.6 | 0.0  | 2009 (NS)   | 8.3                                   | −1.3             | 0.7          | 107.2                                  | −16.5     | 9.3   |
|                          | 5  | −13.4                                   | 21.8  | 24.8 | 0.4  | 1994 (NS)   | 3.5                                   | −1.8             | −7.9         | −58.2                                  | 28.9      | 129.3 |
| JR                       | 6  | −5.1                                    | 29.2  | 32.0 | 0.4  | 2001 (NS)   | 2.9                                   | −0.8             | −6.5         | −66.4                                  | 19.1      | 147.3 |
|                          | 7  | −6.9                                    | 11.3  | 54.7 | 0.2  | 1996 *      | 1.9                                   | −3.0             | −4.8         | −31.8                                  | 51.1      | 80.7  |
|                          | 8  | −11.9                                   | 8.5   | 61.0 | 0.5  | 1996 **     | 1.3                                   | −3.1             | −10.9        | −10.5                                  | 24.6      | 85.9  |
|                          | 9  | −29.7                                   | −10.6 | 22.0 | 0.4  | 1985 *      | −3.1                                  | −2.1             | −24.2        | 10.6                                   | 7.1       | 82.3  |
|                          | 10 | −41.3                                   | 10.3  | 48.5 | 1.0  | 1996 **     | 2.4                                   | −5.1             | −29.5        | −7.6                                   | 15.8      | 91.8  |
| WR                       | 11 | −34.1                                   | −25.6 | 56.6 | 0.4  | 1993 **     | −8.5                                  | −7.5             | −20.4        | 23.4                                   | 20.6      | 56    |
|                          | 12 | −12.9                                   | −3.2  | 34.3 | 0.5  | 1992 **     | −0.6                                  | −2.6             | −10.3        | 4.3                                    | 19        | 76.7  |
|                          | 13 | −19.5                                   | −13.0 | 42.5 | 0.8  | 1993 **     | −2.2                                  | −2.5             | −16.6        | 10.2                                   | 11.7      | 78.1  |
|                          | 14 | −69.2                                   | −45.7 | 63.4 | 0.8  | 1993 **     | −16.2                                 | −8.0             | −50.8        | 21.7                                   | 10.6      | 67.7  |
|                          | 15 | −37.3                                   | −28.6 | 30.2 | 0.3  | 1990 (NS)   | −11.2                                 | −5.0             | −22.0        | 29.5                                   | 13        | 57.5  |
|                          | 16 | 18.3                                    | 45.7  | 33.7 | −0.2 | 2008 (NS)   | 15.6                                  | −4.2             | 12.5         | 65.1                                   | −17.7     | 52.6  |

P: precipitation; PET: potential evapotranspiration; n: watershed characteristic parameter

Abrupt year: \*\*: significant at  $P < 0.01$ ; \*: significant at  $P < 0.05$ ; NS: no significance.

$\Delta R_P$ ,  $\Delta R_{PET}$ ,  $\Delta R_n$  are the runoff change induced by change of P, PET, parameter n after the abrupt year, respectively.  $C_P$ ,  $C_{PET}$ ,  $C_n$  are the relative contribution of P, PET, parameter n to runoff change.
